## CORRECTION

# Correction: Coherent detection-based photonic radar for autonomous vehicles under diverse weather conditions

The *PLOS ONE* Staff

There is information missing from the Funding statement. The publisher apologizes for the error. The correct Funding statement is as follows: This research project is supported by the Second Century Fund (C2F), Chulalongkorn University, Thailand. This research work is also funded by TSRI Fund (CU\_FRB640001\_01\_21\_8). This project is also supported by Taif University Researchers supporting project number (TURSP-2020/228), Taif University, Taif, Saudi Arabia. The funders had no role in study design, data collection and analysis, decision to publish, or preparation of the manuscript.

## Reference

1. Chaudhary S, Wuttisittikulkij L, Saadi M, Sharma A, Al Otaibi S, Nebhen J, et al. (2021) Coherent detection-based photonic radar for autonomous vehicles under diverse weather conditions. *PLoS ONE* 16(11): e0259438. <https://doi.org/10.1371/journal.pone.0259438> PMID: 34780504

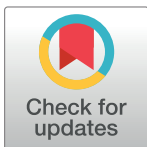

## OPEN ACCESS

**Citation:** The *PLOS ONE* Staff (2021) Correction: Coherent detection-based photonic radar for autonomous vehicles under diverse weather conditions. *PLoS ONE* 16(11): e0260799. <https://doi.org/10.1371/journal.pone.0260799>

**Published:** November 29, 2021

**Copyright:** © 2021 The PLOS ONE Staff. This is an open access article distributed under the terms of the [Creative Commons Attribution License](https://creativecommons.org/licenses/by/4.0/), which permits unrestricted use, distribution, and reproduction in any medium, provided the original author and source are credited.
